# Supplementary material for: microRNA‐9‐5p alleviates blood–brain barrier damage and neuroinflammation after traumatic brain injury
Source: PubMed Central journal article supplement — J Neurochem. 2020 Feb 11;153(6):e14963. doi: 10.1111/jnc.14963 (PMC7317896; doi:10.1111/jnc.14963), 2020-02-11
Supplement: JNC-153-710-s001.pdf [file JNC-153-710-s001.pdf]

## microRNA-9-5p alleviates blood-brain barrier damage and neuroinflammation after traumatic brain injury

Jingchuan Wu<sup>1,2</sup>, Junchi He<sup>2</sup>, Xiaocui Tian<sup>3</sup>, Yuetao Luo<sup>5</sup>, Jianjun Zhong<sup>2</sup>, Hongrong Zhang<sup>2</sup>, Hui Li<sup>2</sup>, Bo Cen<sup>1</sup>, Tao Jiang<sup>4\*</sup>, Xiaochuan Sun<sup>2\*</sup>

1 Department of Neurosurgery, General Hospital of The YangTze River Shipping, Wuhan Brain Hospital, Wuhan, Hubei, 430014, China

2 Department of Neurosurgery, the First Affiliated Hospital of Chongqing Medical University, Chongqing 400016, China

3 College of Pharmacy, Chongqing Key Laboratory of Biochemistry and Molecular Pharmacology, Chongqing Medical University, District of Yuzhong, Chongqing 400016, China

4 Department of Neurosurgery, Beijing Tiantan Hospital of Capital Medical University, Beijing 100070, China

5 Department of Clinical Epidemiology and Biostatistics, Children's Hospital of Chongqing Medical University, Chongqing 400016, China

\* Correspondence to:

Tao Jiang (zacharytaojiang@163.com), Department of Neurosurgery, Beijing Tiantan Hospital of Capital Medical University, Beijing 100070, China

Xiaochuan Sun (sunxch1445@qq.com), Department of Neurosurgery, the First Affiliated Hospital of Chongqing Medical University, Chongqing 400016, China

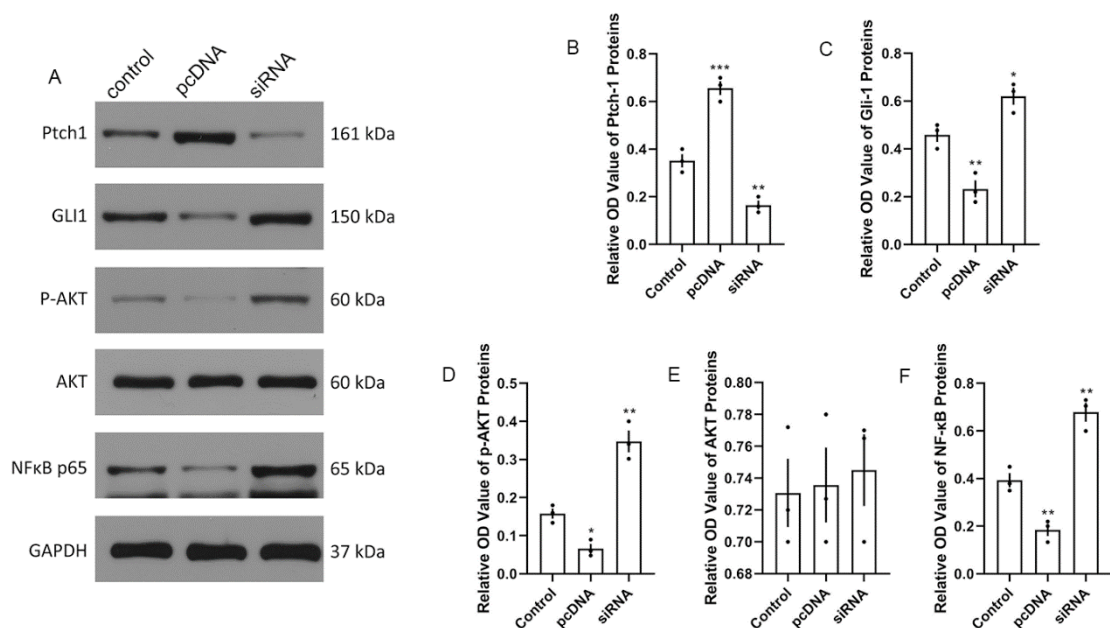

Figure supplement 1. Activation of Hedgehog pathway promoted the expression of p-AKT and NF-κB.

(A) The immunoblotting and quantitative data of (B)Ptch-1 and (C)Gli-1, (D)p-AKT, (E)AKT and (F)NF-κB in BMECs. (n=4/group) (\*P<0.05, \*\*P<0.01, \*\*\*P<0.001 versus the untreated control group.) (n: number of independent cell culture preparation; control: untreated control group.)
